# Supplementary material for: When Is a Species Declining? Optimizing Survey Effort to Detect Population Changes in Reptiles
Source: PubMed Central journal article supplement (PMC3425567; doi:10.1371/journal.pone.0043387), 2012-08-22
Supplement: pone.0043387.s006.pdf [file pone.0043387.s006.pdf]

**Table S3: Occupancy models by species from the 2009, 29 sites data set.**

| Species & Model                                 | $N$ | -2 log<br>likelihood | $\Delta AIC$ | AIC Weight             | $\hat{\psi}(s.e)$ | $\hat{p}(s.e)$ |
|-------------------------------------------------|-----|----------------------|--------------|------------------------|-------------------|----------------|
| <b>Slow-worm</b>                                |     |                      |              |                        |                   |                |
| $\psi(\cdot), p(\text{survey-specific})$        | 7   | 93.18                | 0.00         | 0.34                   | 1.00(-)*          | 0.91 (0.046)   |
| $\psi(\cdot), p(\text{experience})$             | 5   | 97.44                | 0.26         | 0.30                   | 1.00(-)*          | 0.91 (0.041)   |
| $\psi(\cdot), p(\text{cloud cover})$            | 3   | 102.30               | 1.12         | 0.19                   | 1.00(-)*          | 0.91 (0.022)   |
| $\psi(\cdot), p(\cdot)$                         | 2   | 106.46               | 3.28         | 0.07                   | 1.00(-)*          | 0.91 (0.022)   |
| $\psi(\cdot), p(\text{refugia})$                | 3   | 104.79               | 3.61         | 0.06                   | 1.00(-)*          | 0.91 (0.020)   |
| $\psi(\cdot), p(\text{duration})$               | 3   | 105.05               | 3.87         | 0.05                   | 1.00(-)*          | 0.91 (0.030)   |
|                                                 |     |                      |              | <i>Model averaged:</i> | 1.00(-)*          | 0.91 (0.037)   |
| <b>Common lizard</b>                            |     |                      |              |                        |                   |                |
| $\psi(\cdot), p(\text{duration})$               | 3   | 194.82               | 0.00         | 0.52                   | 0.80 (0.076)      | 0.66 (0.042)   |
| $\psi(\text{area}), p(\cdot)$                   | 3   | 198.36               | 3.54         | 0.09                   | 0.79 (0.075)      | 0.68 (0.040)   |
| $\psi(\cdot), p(\cdot)$                         | 2   | 200.74               | 3.92         | 0.07                   | 0.79 (0.075)      | 0.68 (0.040)   |
| $\psi(\cdot), p(\text{cloud cover})$            | 3   | 198.86               | 4.04         | 0.07                   | 0.79 (0.075)      | 0.68 (0.040)   |
| $\psi(\cdot), p(\text{soil temp})$              | 3   | 199.34               | 4.52         | 0.05                   | 0.79 (0.075)      | 0.68 (0.040)   |
| $\psi(\cdot), p(\text{refugia})$                | 3   | 199.89               | 5.07         | 0.04                   | 0.79 (0.075)      | 0.67 (0.040)   |
| $\psi(\text{level and south facing}), p(\cdot)$ | 3   | 200.30               | 5.48         | 0.03                   | 0.79 (0.075)      | 0.68 (0.040)   |
| $\psi(\text{level}), p(\cdot)$                  | 3   | 200.39               | 5.57         | 0.03                   | 0.79 (0.075)      | 0.68 (0.040)   |
| $\psi(\cdot), p(\text{air temp})^a$             | 3   | 200.60               | 5.78         | 0.03                   | 0.79 (0.075)      | 0.68 (0.040)   |
| $\psi(\text{south facing}), p(\cdot)^a$         | 3   | 200.73               | 5.91         | 0.03                   | 0.79 (0.075)      | 0.68 (0.040)   |
| $\psi(\cdot), p(\text{experience})$             | 6   | 196.56               | 7.74         | 0.01                   | 0.79 (0.075)      | 0.67 (0.040)   |
| $\psi(\cdot), p(\text{survey-specific})$        | 7   | 194.98               | 8.16         | 0.01                   | 0.79 (0.075)      | 0.68 (0.042)   |
| $\psi(\text{soil type}), p(\cdot)$              | 5   | 199.34               | 8.52         | 0.01                   | 0.79 (0.075)      | 0.68 (0.040)   |
| $\psi(\text{connectivity}), p(\cdot)$           | 6   | 200.34               | 11.52        | 0.00                   | 0.79 (0.075)      | 0.68 (0.040)   |
|                                                 |     |                      |              | <i>Model averaged:</i> | 0.80 (0.076)      | 0.67 (0.042)   |

| Species & Model                                  | $N$ | -2 log likelihood | $\Delta AIC$ | AIC Weight             | $\hat{\psi}(s.e)$ | $\hat{p}(s.e)$ |
|--------------------------------------------------|-----|-------------------|--------------|------------------------|-------------------|----------------|
| <b>Sand lizard</b>                               |     |                   |              |                        |                   |                |
| $\psi(\cdot), p(\text{survey-specific})$         | 7   | 64.73             | 0.00         | 0.24                   | 0.21 (0.077)      | 0.41 (0.114)   |
| $\psi(\cdot), p(\cdot)$                          | 2   | 75.83             | 1.10         | 0.14                   | 0.21 (0.079)      | 0.42 (0.091)   |
| $\psi(\cdot), p(\text{refugia})$                 | 3   | 74.07             | 1.34         | 0.12                   | 0.24 (0.091)      | 0.35 (0.083)   |
| $\psi(\text{area}), p(\cdot)$                    | 3   | 74.74             | 2.01         | 0.09                   | 0.21 (0.077)      | 0.42 (0.092)   |
| $\psi(\cdot), p(\text{duration})$                | 3   | 75.00             | 2.27         | 0.08                   | 0.21 (0.076)      | 0.56 (0.151)   |
| $\psi(\cdot), p(\text{soil temp})^a$             | 3   | 75.55             | 2.82         | 0.06                   | 0.22 (0.079)      | 0.42 (0.091)   |
| $\psi(\cdot), p(\text{air temp})^a$              | 3   | 75.57             | 2.84         | 0.06                   | 0.21 (0.078)      | 0.43 (0.092)   |
| $\psi(\text{south facing}), p(\cdot)^a$          | 3   | 75.63             | 2.90         | 0.06                   | 0.21 (0.078)      | 0.42 (0.092)   |
| $\psi(\text{level \& south facing}), p(\cdot)^a$ | 3   | 75.65             | 2.92         | 0.06                   | 0.21 (0.078)      | 0.42 (0.092)   |
| $\psi(\cdot), p(\text{cloud cover})^a$           | 3   | 75.81             | 3.08         | 0.05                   | 0.22 (0.078)      | 0.42 (0.094)   |
| $\psi(\text{level}), p(\cdot)^a$                 | 3   | 75.82             | 3.09         | 0.05                   | 0.21 (0.078)      | 0.42 (0.092)   |
|                                                  |     |                   |              | <i>Model averaged:</i> | 0.21 (0.080)      | 0.42 (0.108)   |
| <b>Adder</b>                                     |     |                   |              |                        |                   |                |
| $\psi(\text{level \& south facing}), p(\cdot)$   | 3   | 208.87            | 0.00         | 0.63                   | 0.80 (0.067)      | 0.55 (0.043)   |
| $\psi(\cdot), p(\text{duration})$                | 3   | 212.01            | 3.14         | 0.13                   | 0.81 (0.077)      | 0.53 (0.045)   |
| $\psi(\text{south facing}), p(\cdot)$            | 3   | 214.13            | 5.26         | 0.05                   | 0.79 (0.078)      | 0.55 (0.044)   |
| $\psi(\cdot), p(\cdot)$                          | 2   | 216.27            | 5.40         | 0.04                   | 0.80 (0.076)      | 0.55 (0.044)   |
| $\psi(\text{area}), p(\cdot)$                    | 3   | 214.72            | 5.85         | 0.03                   | 0.81 (0.068)      | 0.55 (0.044)   |
| $\psi(\cdot), p(\text{soil temp})$               | 3   | 215.73            | 6.86         | 0.02                   | 0.80 (0.076)      | 0.55 (0.044)   |
| $\psi(\cdot), p(\text{refugia})^a$               | 3   | 215.78            | 6.91         | 0.02                   | 0.80 (0.076)      | 0.55 (0.044)   |
| $\psi(\cdot), p(\text{experience})$              | 6   | 210.01            | 7.14         | 0.02                   | 0.85 (0.076)      | 0.50 (0.076)   |
| $\psi(\text{level}), p(\cdot)^a$                 | 3   | 216.06            | 7.19         | 0.02                   | 0.80 (0.076)      | 0.55 (0.044)   |
| $\psi(\cdot), p(\text{air temp})^a$              | 3   | 216.23            | 7.36         | 0.02                   | 0.80 (0.076)      | 0.55 (0.044)   |
| $\psi(\cdot), p(\text{cloud cover})^a$           | 3   | 216.27            | 7.40         | 0.02                   | 0.80 (0.076)      | 0.55 (0.044)   |
| $\psi(\text{soil type}), p(\cdot)$               | 5   | 214.40            | 9.53         | 0.01                   | 0.80 (0.076)      | 0.55 (0.044)   |
| $\psi(\text{connectivity}), p(\cdot)$            | 6   | 213.67            | 10.80        | 0.00                   | 0.80 (0.076)      | 0.55 (0.044)   |
| $\psi(\cdot), p(\text{survey-specific})$         | 7   | 212.20            | 11.33        | 0.00                   | 0.80 (0.076)      | 0.55 (0.103)   |
|                                                  |     |                   |              | <i>Model averaged:</i> | 0.80 (0.071)      | 0.55 (0.045)   |

| Species & Model                                | <i>N</i> | -2 log<br>likelihood | $\Delta$ AIC | AIC Weight             | $\hat{\psi}(s.e)$ | $\hat{p}(s.e)$ |
|------------------------------------------------|----------|----------------------|--------------|------------------------|-------------------|----------------|
| Grass snake                                    |          |                      |              |                        |                   |                |
| $\psi(\cdot), p(\text{survey-specific})$       | 7        | 192.65               | 0.00         | 0.23                   | 0.73 (0.084)      | 0.54 (0.068)   |
| $\psi(\cdot), p(\text{soil temp})$             | 3        | 201.39               | 0.74         | 0.16                   | 0.73 (0.084)      | 0.54 (0.084)   |
| $\psi(\text{level}), p(\cdot)$                 | 3        | 201.98               | 1.33         | 0.12                   | 0.73 (0.080)      | 0.53 (0.046)   |
| $\psi(\cdot), p(\text{duration})$              | 3        | 202.40               | 1.75         | 0.10                   | 0.74 (0.085)      | 0.52 (0.048)   |
| $\psi(\cdot), p(\cdot)$                        | 2        | 204.84               | 2.19         | 0.08                   | 0.73 (0.084)      | 0.53 (0.046)   |
| $\psi(\cdot), p(\text{cloud cover})$           | 3        | 202.96               | 2.31         | 0.07                   | 0.73 (0.084)      | 0.53 (0.046)   |
| $\psi(\text{area}), p(\cdot)$                  | 3        | 203.17               | 2.52         | 0.07                   | 0.73 (0.082)      | 0.53 (0.046)   |
| $\psi(\cdot), p(\text{air temp})$              | 3        | 203.18               | 2.53         | 0.07                   | 0.73 (0.084)      | 0.54 (0.046)   |
| $\psi(\text{level \& south facing}), p(\cdot)$ | 3        | 203.31               | 2.66         | 0.06                   | 0.73 (0.082)      | 0.54 (0.046)   |
| $\psi(\cdot), p(\text{refugia})^a$             | 3        | 204.83               | 4.18         | 0.03                   | 0.73 (0.084)      | 0.54 (0.047)   |
| $\psi(\text{connectivity}), p(\cdot)$          | 6        | 201.58               | 6.93         | 0.01                   | 0.73 (0.084)      | 0.53 (0.046)   |
| $\psi(\text{soil type}), p(\cdot)^a$           | 5        | 204.03               | 7.38         | 0.01                   | 0.73 (0.143)      | 0.53 (0.046)   |
|                                                |          |                      |              | <i>Model averaged:</i> | 0.73 (0.084)      | 0.53 (0.058)   |
| Smooth snake                                   |          |                      |              |                        |                   |                |
| $\psi(\cdot), p(\text{duration})$              | 3        | 63.06                | 0.00         | 0.38                   | 0.21 (0.076)      | 0.85 (0.053)   |
| $\psi(\cdot), p(\text{cloud cover})$           | 3        | 64.12                | 1.06         | 0.23                   | 0.21 (0.075)      | 0.74 (0.068)   |
| $\psi(\cdot), p(\text{soil temp})$             | 3        | 64.87                | 1.81         | 0.15                   | 0.21 (0.075)      | 0.77 (0.064)   |
| $\psi(\cdot), p(\text{survey-specific})$       | 7        | 57.89                | 2.83         | 0.09                   | 0.21 (0.075)      | 0.75 (0.121)   |
| $\psi(\cdot), p(\text{air temp})$              | 3        | 67.68                | 4.62         | 0.04                   | 0.21 (0.075)      | 0.74 (0.072)   |
| $\psi(\cdot), p(\cdot)$                        | 2        | 70.05                | 4.99         | 0.03                   | 0.21 (0.075)      | 0.75 (0.072)   |
| $\psi(\text{south facing}), p(\cdot)$          | 3        | 69.38                | 6.32         | 0.02                   | 0.21 (0.074)      | 0.75 (0.072)   |
| $\psi(\cdot), p(\text{refugia})$               | 3        | 69.45                | 6.39         | 0.02                   | 0.21 (0.075)      | 0.77 (0.072)   |
| $\psi(\text{level \& south facing}), p(\cdot)$ | 3        | 69.54                | 6.48         | 0.02                   | 0.20 (0.074)      | 0.75 (0.071)   |
| $\psi(\text{area}), p(\cdot)^a$                | 3        | 69.72                | 6.66         | 0.01                   | 0.20 (0.074)      | 0.75 (0.072)   |
| $\psi(\text{level}), p(\cdot)^a$               | 3        | 70.04                | 6.98         | 0.01                   | 0.21 (0.075)      | 0.75 (0.072)   |
| $\psi(\text{connectivity}), p(\cdot)$          | 6        | 66.40                | 9.34         | 0.00                   | 0.21 (0.136)      | 0.75 (0.072)   |
|                                                |          |                      |              | <i>Model averaged:</i> | 0.21 (0.076)      | 0.79 (0.084)   |

$N$  = Number of parameters in the model,  $\hat{\psi}$  = estimated occupancy probability, and  $\hat{p}$  = estimated detection probability. Models that failed to converge were discarded. 15 models were therefore run for each species in this data set, except for slow-worm where occupancy was known to be 1.00 and models with occupancy covariates were not therefore run, reducing the number of candidate models for this species to 8. Model notation used is:

|                        |                                                                  |               |                                        |
|------------------------|------------------------------------------------------------------|---------------|----------------------------------------|
| (.)                    | The parameter was a constant                                     | (air temp)    | Mean air temperature during surveys    |
| (survey-specific)      | The parameter varied over time                                   | (soil temp)   | Mean soil temperature during surveys   |
| (area)                 | The area of the site measured in hectares                        | (cloud cover) | Proportion of the sky covered by cloud |
| (connectivity)         | The connectivity of the site with other areas of habitat         | (duration)    | Length of the survey in minutes        |
| (human impact)         | The amount of human activity at the site                         | (refugia)     | The total number of refugia checked    |
| (level)                | The proportion of the site that was level                        | (experience)  | The field experience of each surveyor  |
| (south facing)         | The proportion of the site that faced south                      |               |                                        |
| (level & south facing) | The proportions of the previous two categories combined          |               |                                        |
| (soil type)            | Classification of site soil types into acid, alkaline or neutral |               |                                        |

Further details of covariates are given in the text.

\* standard errors not computed as estimate is on the boundary of the parameter space; uncertainty is in any case small as the species was detected in all 29 sites.

<sup>a</sup> note that in these models the covariate can be considered to be acting as a “pretending variable” [30]
