# Supplementary material for: When Is a Species Declining? Optimizing Survey Effort to Detect Population Changes in Reptiles
Source: PubMed Central journal article supplement (PMC3425567; doi:10.1371/journal.pone.0043387), 2012-08-22
Supplement: pone.0043387.s008.pdf [file pone.0043387.s008.pdf]

**Table S5: Occupancy models by species from the 2010, 45 sites data set.**

| Model                                           | $N$ | -2 log likelihood | $\Delta$ AIC | AIC Weight             | $\hat{\psi}(s.e)$ | $\hat{p}(s.e)$ |
|-------------------------------------------------|-----|-------------------|--------------|------------------------|-------------------|----------------|
| <b>Slow-worm</b>                                |     |                   |              |                        |                   |                |
| $\psi(\cdot), p(\text{survey-specific})$        | 7   | 211.45            | 0.00         | 1.00                   | 0.87 (0.051)      | 0.82 (0.053)   |
| $\psi(\cdot), p(\text{soil temp})$              | 3   | 238.11            | 18.66        | 0.00                   | 0.87 (0.051)      | 0.82 (0.024)   |
| $\psi(\cdot), p(\text{refugia})$                | 3   | 238.34            | 18.89        | 0.00                   | 0.87 (0.051)      | 0.83 (0.025)   |
| $\psi(\cdot), p(\text{experience})$             | 6   | 237.95            | 24.50        | 0.00                   | 0.87 (0.051)      | 0.83 (0.041)   |
| $\psi(\cdot), p(\cdot)$                         | 2   | 248.22            | 26.77        | 0.00                   | 0.87 (0.051)      | 0.83 (0.025)   |
| $\psi(\text{area}), p(\cdot)$                   | 3   | 246.70            | 27.25        | 0.00                   | 0.87 (0.050)      | 0.83 (0.025)   |
| $\psi(\text{south facing}), (\cdot)$            | 3   | 247.46            | 28.01        | 0.00                   | 0.87 (0.049)      | 0.83 (0.025)   |
| $\psi(\text{level}), (\cdot)$                   | 3   | 247.60            | 28.15        | 0.00                   | 0.87 (0.050)      | 0.83 (0.025)   |
| $\psi(\cdot), p(\text{cloud cover})$            | 3   | 247.78            | 28.33        | 0.00                   | 0.87 (0.051)      | 0.83 (0.025)   |
| $\psi(\cdot), p(\text{air temp})^a$             | 3   | 248.08            | 28.63        | 0.00                   | 0.87 (0.051)      | 0.83 (0.025)   |
| $\psi(\cdot), p(\text{duration})^a$             | 3   | 248.19            | 28.74        | 0.00                   | 0.87 (0.051)      | 0.83 (0.025)   |
| $\psi(\text{level \& south facing}), (\cdot)^a$ | 3   | 248.21            | 28.76        | 0.00                   | 0.87 (0.051)      | 0.83 (0.025)   |
|                                                 |     |                   |              | <i>Model averaged:</i> | 0.87 (0.051)      | 0.82 (0.053)   |
| <b>Common lizard</b>                            |     |                   |              |                        |                   |                |
| $\psi(\cdot), p(\text{duration})$               | 3   | 298.90            | 0.00         | 0.80                   | 0.76 (0.065)      | 0.63 (0.034)   |
| $\psi(\cdot), p(\text{survey-specific})$        | 7   | 296.16            | 5.26         | 0.06                   | 0.76 (0.064)      | 0.64 (0.081)   |
| $\psi(\text{soil type}), (\cdot)$               | 5   | 300.69            | 5.79         | 0.04                   | 0.76 (0.097)      | 0.64 (0.035)   |
| $\psi(\cdot), p(\cdot)$                         | 2   | 308.22            | 7.32         | 0.02                   | 0.76 (0.064)      | 0.64 (0.035)   |
| $\psi(\cdot), p(\text{refugia})$                | 3   | 307.02            | 8.12         | 0.01                   | 0.76 (0.064)      | 0.64 (0.035)   |
| $\psi(\text{area}), p(\cdot)$                   | 3   | 307.24            | 8.34         | 0.01                   | 0.76 (0.064)      | 0.64 (0.035)   |
| $\psi(\cdot), p(\text{air temp})$               | 3   | 307.29            | 8.39         | 0.01                   | 0.76 (0.064)      | 0.64 (0.035)   |
| $\psi(\cdot), p(\text{soil temp})$              | 3   | 307.69            | 8.79         | 0.01                   | 0.76 (0.064)      | 0.64 (0.035)   |
| $\psi(\cdot), p(\text{cloud cover})$            | 3   | 307.71            | 8.81         | 0.01                   | 0.76 (0.064)      | 0.64 (0.035)   |
| $\psi(\text{level}), p(\cdot)^a$                | 3   | 307.78            | 8.88         | 0.01                   | 0.76 (0.064)      | 0.64 (0.035)   |
| $\psi(\text{south facing}), p(\cdot)^a$         | 3   | 308.08            | 9.18         | 0.01                   | 0.76 (0.064)      | 0.64 (0.035)   |
|                                                 |     |                   |              | <i>Model averaged:</i> | 0.76 (0.066)      | 0.63 (0.037)   |

| Model                                            | <i>N</i> | -2 log likelihood | $\Delta$ AIC | AIC Weight             | $\hat{\psi}(s.e)$ | $\hat{p}(s.e)$ |
|--------------------------------------------------|----------|-------------------|--------------|------------------------|-------------------|----------------|
| <b>Sand lizard</b>                               |          |                   |              |                        |                   |                |
| $\psi(\text{soil type}), p(\cdot)$               | 5        | 70.06             | 0.00         | 0.85                   | 0.14 (0.046)      | 0.43 (0.089)   |
| $\psi(\cdot), p(\text{air temp})$                | 3        | 78.94             | 4.88         | 0.07                   | 0.15 (0.057)      | 0.35 (0.089)   |
| $\psi(\cdot), p(\text{soil temp})$               | 3        | 81.84             | 7.78         | 0.02                   | 0.14 (0.053)      | 0.44 (0.086)   |
| $\psi(\cdot), p(\cdot)$                          | 2        | 84.32             | 8.26         | 0.01                   | 0.14 (0.053)      | 0.43 (0.089)   |
| $\psi(\cdot), p(\text{duration})$                | 3        | 82.57             | 8.51         | 0.01                   | 0.18 (0.086)      | 0.26 (0.118)   |
| $\psi(\cdot), p(\text{cloud cover})$             | 3        | 83.79             | 9.73         | 0.01                   | 0.14 (0.053)      | 0.44 (0.091)   |
| $\psi(\text{level \& south facing}), p(\cdot)^a$ | 3        | 83.90             | 9.84         | 0.01                   | 0.14 (0.056)      | 0.43 (0.089)   |
| $\psi(\text{level}), p(\cdot)^a$                 | 3        | 84.24             | 10.18        | 0.01                   | 0.14 (0.053)      | 0.43 (0.089)   |
| $\psi(\text{south facing}), p(\cdot)^a$          | 3        | 84.27             | 10.21        | 0.01                   | 0.14 (0.053)      | 0.43 (0.089)   |
| $\psi(\text{area}), p(\cdot)^a$                  | 3        | 84.29             | 10.23        | 0.01                   | 0.14 (0.053)      | 0.43 (0.089)   |
| $\psi(\cdot), p(\text{refugia})^a$               | 3        | 84.32             | 10.26        | 0.01                   | 0.14 (0.053)      | 0.43 (0.090)   |
| $\psi(\text{connectivity}), p(\cdot)$            | 6        | 80.37             | 12.31        | 0.00                   | 0.14 (0.098)      | 0.43 (0.089)   |
| $\psi(\cdot), p(\text{survey-specific})$         | 7        | 81.91             | 15.85        | 0.00                   | 0.14 (0.053)      | 0.43 (0.195)   |
|                                                  |          |                   |              | <i>Model averaged:</i> | 0.14 (0.048)      | 0.42 (0.093)   |
| <b>Adder</b>                                     |          |                   |              |                        |                   |                |
| $\psi(\text{level \& south facing}), p(\cdot)$   | 3        | 257.53            | 0.00         | 0.29                   | 0.56 (0.072)      | 0.57 (0.042)   |
| $\psi(\cdot), p(\cdot)$                          | 2        | 261.51            | 1.98         | 0.11                   | 0.56 (0.075)      | 0.57 (0.042)   |
| $\psi(\cdot), p(\text{survey-specific})$         | 7        | 251.74            | 2.21         | 0.10                   | 0.56 (0.075)      | 0.57 (0.097)   |
| $\psi(\text{level}), p(\cdot)$                   | 3        | 259.82            | 2.29         | 0.09                   | 0.56 (0.073)      | 0.57 (0.042)   |
| $\psi(\cdot), p(\text{soil temp})$               | 3        | 260.36            | 2.83         | 0.07                   | 0.56 (0.075)      | 0.57 (0.042)   |
| $\psi(\cdot), p(\text{cloud cover})$             | 3        | 260.45            | 2.92         | 0.07                   | 0.56 (0.075)      | 0.58 (0.042)   |
| $\psi(\cdot), p(\text{duration})$                | 3        | 260.75            | 3.22         | 0.06                   | 0.56 (0.075)      | 0.56 (0.043)   |
| $\psi(\text{area}), p(\cdot)$                    | 3        | 260.80            | 3.27         | 0.06                   | 0.56 (0.074)      | 0.57 (0.042)   |
| $\psi(\cdot), p(\text{refugia})$                 | 3        | 260.89            | 3.36         | 0.05                   | 0.56 (0.075)      | 0.57 (0.042)   |
| $\psi(\cdot), p(\text{air temp})$                | 3        | 260.92            | 3.39         | 0.05                   | 0.56 (0.075)      | 0.58 (0.042)   |
| $\psi(\text{south facing}), p(\cdot)^a$          | 3        | 261.50            | 3.97         | 0.04                   | 0.56 (0.075)      | 0.57 (0.042)   |
| $\psi(\text{connectivity}), p(\cdot)$            | 6        | 257.74            | 6.21         | 0.01                   | 0.56 (0.140)      | 0.57 (0.042)   |
| $\psi(\text{human impact}), p(\cdot)$            | 7        | 260.23            | 10.70        | 0.00                   | 0.56 (0.075)      | 0.57 (0.042)   |
|                                                  |          |                   |              | <i>Model averaged:</i> | 0.56 (0.075)      | 0.57 (0.048)   |

| Model                                            | <i>N</i> | -2 log<br>likelihood | $\Delta$ AIC | AIC<br>Weight          | $\hat{\psi}(s.e)$ | $\hat{p}(s.e)$ |
|--------------------------------------------------|----------|----------------------|--------------|------------------------|-------------------|----------------|
| Grass snake                                      |          |                      |              |                        |                   |                |
| $\psi(\cdot), p(\text{soil temp})$               | 3        | 272.61               | 0.00         | 0.94                   | 0.67 (0.075)      | 0.43 (0.039)   |
| $\psi(\cdot), p(\text{survey-specific})$         | 7        | 270.12               | 5.51         | 0.06                   | 0.66 (0.074)      | 0.45 (0.087)   |
| $\psi(\cdot), p(\text{air temp})$                | 3        | 283.24               | 10.63        | 0.00                   | 0.68 (0.076)      | 0.43 (0.040)   |
| $\psi(\cdot), p(\cdot)$                          | 2        | 291.38               | 16.77        | 0.00                   | 0.67 (0.075)      | 0.45 (0.041)   |
| $\psi(\cdot), p(\text{cloud cover})$             | 3        | 290.21               | 17.60        | 0.00                   | 0.67 (0.075)      | 0.44 (0.041)   |
| $\psi(\cdot), p(\text{duration})^a$              | 3        | 291.23               | 18.62        | 0.00                   | 0.67 (0.075)      | 0.50 (0.043)   |
| $\psi(\text{level}), p(\cdot)^a$                 | 3        | 291.34               | 18.73        | 0.00                   | 0.67 (0.075)      | 0.45 (0.041)   |
| $\psi(\cdot), p(\text{refugia})^a$               | 3        | 291.35               | 18.74        | 0.00                   | 0.67 (0.075)      | 0.45 (0.041)   |
| $\psi(\text{level \& south facing}), p(\cdot)^a$ | 3        | 291.36               | 18.75        | 0.00                   | 0.67 (0.075)      | 0.45 (0.041)   |
| $\psi(\text{area}), p(\cdot)^a$                  | 3        | 291.37               | 18.76        | 0.00                   | 0.67 (0.075)      | 0.45 (0.041)   |
| $\psi(\text{south facing}), p(\cdot)^a$          | 3        | 291.37               | 18.76        | 0.00                   | 0.67 (0.075)      | 0.45 (0.041)   |
| $\psi(\text{soil type}), p(\cdot)$               | 5        | 287.68               | 19.07        | 0.00                   | 0.67 (0.123)      | 0.45 (0.041)   |
| $\psi(\cdot), p(\text{experience})$              | 6        | 288.43               | 21.82        | 0.00                   | 0.68 (0.077)      | 0.44 (0.074)   |
| $\psi(\text{connectivity}), p(\cdot)$            | 6        | 289.01               | 22.40        | 0.00                   | 0.67 (0.140)      | 0.45 (0.041)   |
|                                                  |          |                      |              | <i>Model averaged:</i> | 0.67 (0.075)      | 0.43 (0.042)   |
| Smooth snake                                     |          |                      |              |                        |                   |                |
| $\psi(\cdot), p(\text{soil temp})$               | 3        | 80.24                | 0.00         | 0.88                   | 0.16 (0.054)      | 0.64 (0.059)   |
| $\psi(\cdot), p(\text{survey-specific})$         | 7        | 76.66                | 4.42         | 0.10                   | 0.16 (0.054)      | 0.62 (0.133)   |
| $\psi(\text{area}), p(\cdot)$                    | 3        | 90.11                | 9.87         | 0.01                   | 0.16 (0.050)      | 0.62 (0.076)   |
| $\psi(\cdot), p(\text{refugia})$                 | 3        | 90.94                | 10.70        | 0.00                   | 0.16 (0.054)      | 0.67 (0.071)   |
| $\psi(\text{level \& south facing}), p(\cdot)$   | 3        | 91.90                | 11.66        | 0.00                   | 0.16 (0.052)      | 0.62 (0.076)   |
| $\psi(\cdot), p(\cdot)$                          | 2        | 94.65                | 12.41        | 0.00                   | 0.16 (0.075)      | 0.62 (0.076)   |
| $\psi(\cdot), p(\text{air temp})$                | 3        | 93.44                | 13.20        | 0.00                   | 0.16 (0.055)      | 0.59 (0.082)   |
| $\psi(\cdot), p(\text{duration})$                | 3        | 93.80                | 13.56        | 0.00                   | 0.16 (0.054)      | 0.68 (0.092)   |
| $\psi(\text{south facing}), p(\cdot)$            | 3        | 94.08                | 13.84        | 0.00                   | 0.16 (0.054)      | 0.62 (0.076)   |
| $\psi(\text{level}), p(\cdot)^a$                 | 3        | 94.26                | 14.02        | 0.00                   | 0.16 (0.054)      | 0.63 (0.076)   |
| $\psi(\cdot), p(\text{cloud cover})^a$           | 3        | 94.58                | 14.34        | 0.00                   | 0.16 (0.054)      | 0.62 (0.076)   |
| $\psi(\text{connectivity}), p(\cdot)$            | 6        | 90.36                | 16.12        | 0.00                   | 0.16 (0.100)      | 0.62 (0.076)   |
|                                                  |          |                      |              | <i>Model averaged:</i> | 0.16 (0.054)      | 0.64 (0.067)   |

$N$  = Number of parameters in the model,  $\hat{\psi}$  = estimated occupancy probability, and  $\hat{p}$  = estimated detection probability. Models that failed to converge were discarded. 15 models were therefore run for each species in this data set. Model notation used is:

|                        |                                                                  |               |                                        |
|------------------------|------------------------------------------------------------------|---------------|----------------------------------------|
| (.)                    | The parameter was a constant                                     | (air temp)    | Mean air temperature during surveys    |
| (survey-specific)      | The parameter varied over time                                   | (soil temp)   | Mean soil temperature during surveys   |
| (area)                 | The area of the site measured in hectares                        | (cloud cover) | Proportion of the sky covered by cloud |
| (connectivity)         | The connectivity of the site with other areas of habitat         | (duration)    | Length of the survey in minutes        |
| (human impact)         | The amount of human activity at the site                         | (refugia)     | The total number of refugia checked    |
| (level)                | The proportion of the site that was level                        | (experience)  | The field experience of each surveyor  |
| (south facing)         | The proportion of the site that faced south                      |               |                                        |
| (level & south facing) | The proportions of the previous two categories combined          |               |                                        |
| (soil type)            | Classification of site soil types into acid, alkaline or neutral |               |                                        |

Further details of covariates are given in the text.

<sup>a</sup> note that in these models the covariate can be considered to be acting as a “pretending variable” [30]
