# Supplementary material for: When Is a Species Declining? Optimizing Survey Effort to Detect Population Changes in Reptiles
Source: PubMed Central journal article supplement (PMC3425567; doi:10.1371/journal.pone.0043387), 2012-08-22
Supplement: pone.0043387.s009.pdf [file pone.0043387.s009.pdf]

**Table S6: Monthly variation in detection probability (s.e.) by species and data set**

| Species        | March       | April       | May         | June        | July        | September   |
|----------------|-------------|-------------|-------------|-------------|-------------|-------------|
| Slow-worm      |             |             |             |             |             |             |
| 2010, 29 sites | 0.44(0.096) | 0.97(0.034) | 0.90(0.057) | 0.83(0.070) | 0.79(0.075) | 0.97(0.034) |
| 2010, 45 sites | 0.49(0.082) | 0.92(0.043) | 0.92(0.044) | 0.82(0.061) | 0.82(0.061) | 0.97(0.025) |

Only includes the single species where a model suggesting variation in detection over time in Tables S3, S4 and S5 accounted for >0.5 of AIC weight.
